# Supplementary material for: Endogenous Ceramide Contributes to the Transcytosis of oxLDL across Endothelial Cells and Promotes Its Subendothelial Retention in Vascular Wall
Source: Hindawi journal article supplement (doi:10.1155/2014/823071), 2014-01-01
Supplement: f1 [file 823071.f1.pdf]

## Supplementary Figure

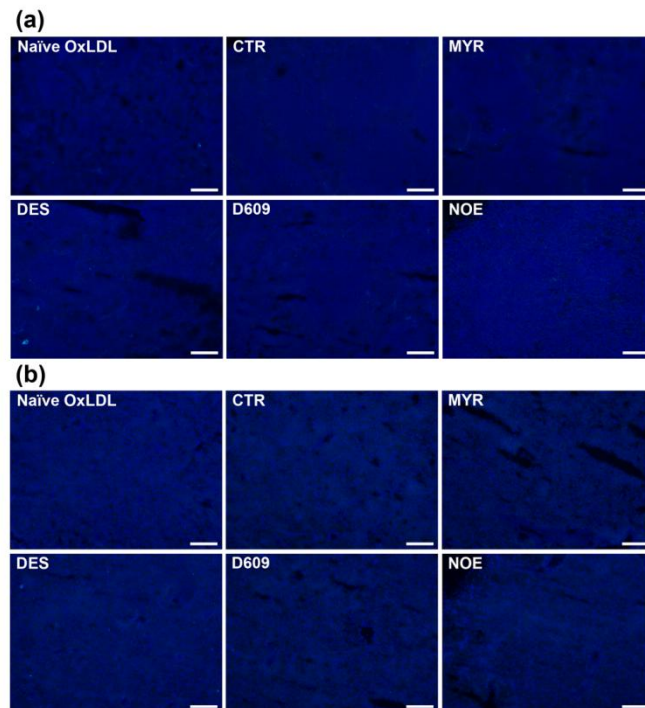

FIGURE S1: Fluorescence microscopic images of spleens and livers of C57 mice after injection with FITC-oxLDL (50  $\mu\text{g}/\text{mouse}$ ). “Naive OxLDL” group mice were injected with unlabeled oxLDL. (a) Sections of spleen stained with DAPI. (b) Sections of liver stained with DAPI. Scale bars = 500  $\mu\text{m}$ .
